# Supplementary material
Source: PubMed Central journal article supplement (PMC7114869)
Supplement: mmc4.pdf [file mmc4.pdf]

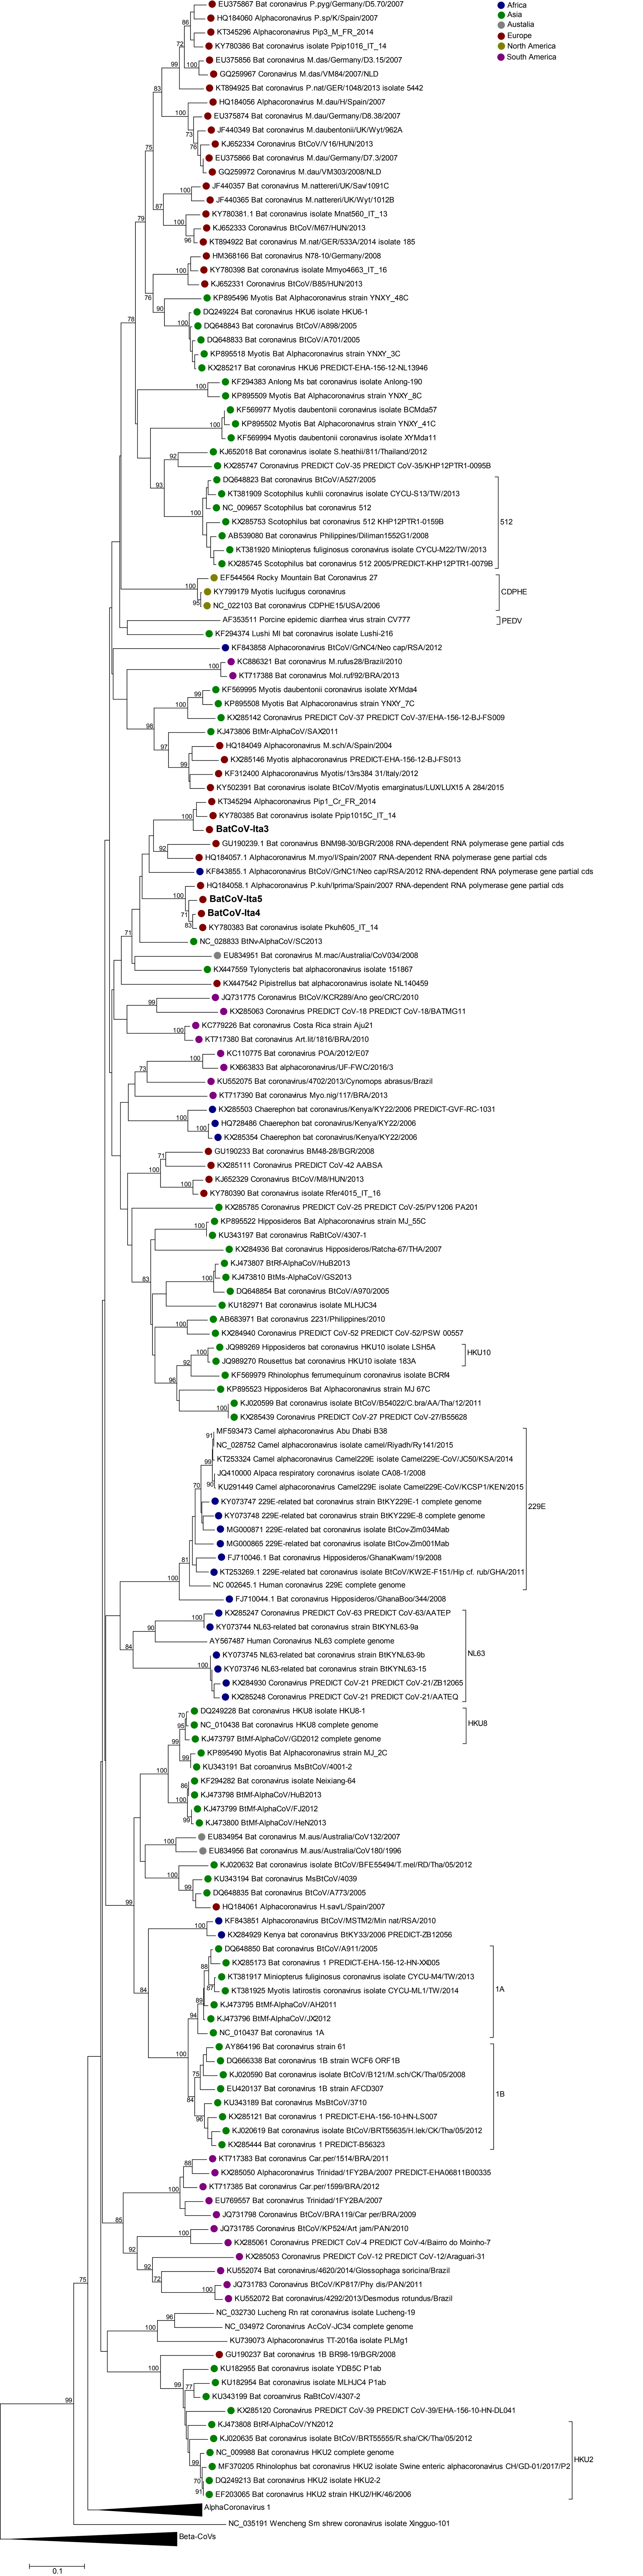

- Africa
- Asia
- Australia
- Europe
- North America
- South America

512  
CDPHE  
PEDV

HKU10  
229E

NL63  
HKU8

1A  
1B

HKU2

Beta-CoVs

0.1
