# Supplementary material
Source: PubMed Central journal article supplement (PMC7114869)

# BatCoV-Ita3

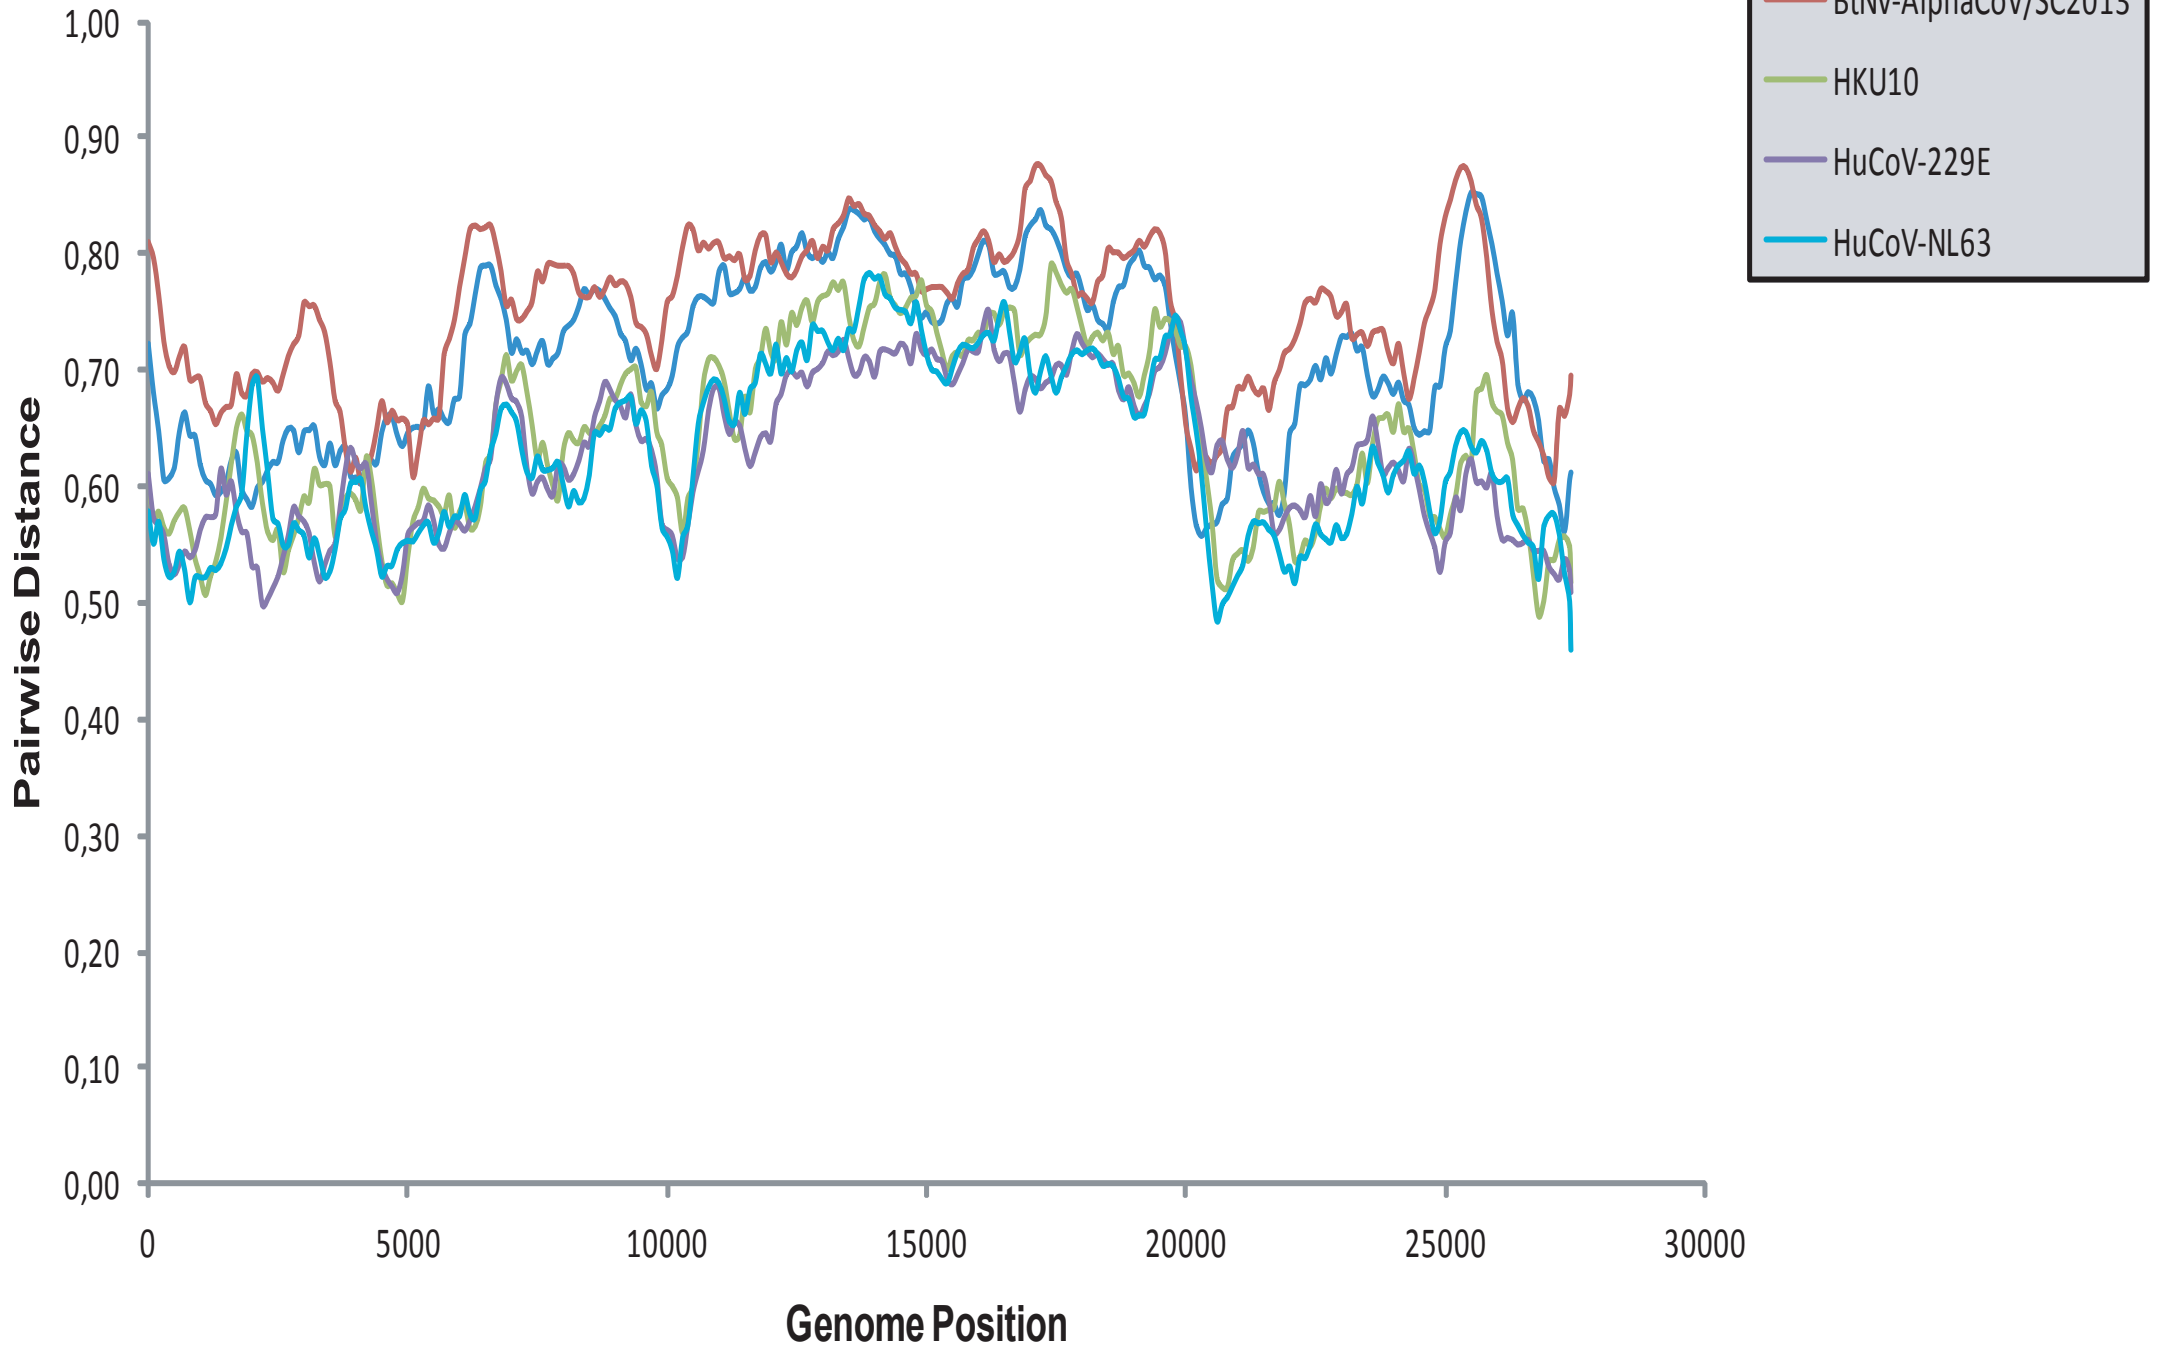

Supplement: mmc1.pdf [file mmc1.pdf]

# BatCoV-Ita4

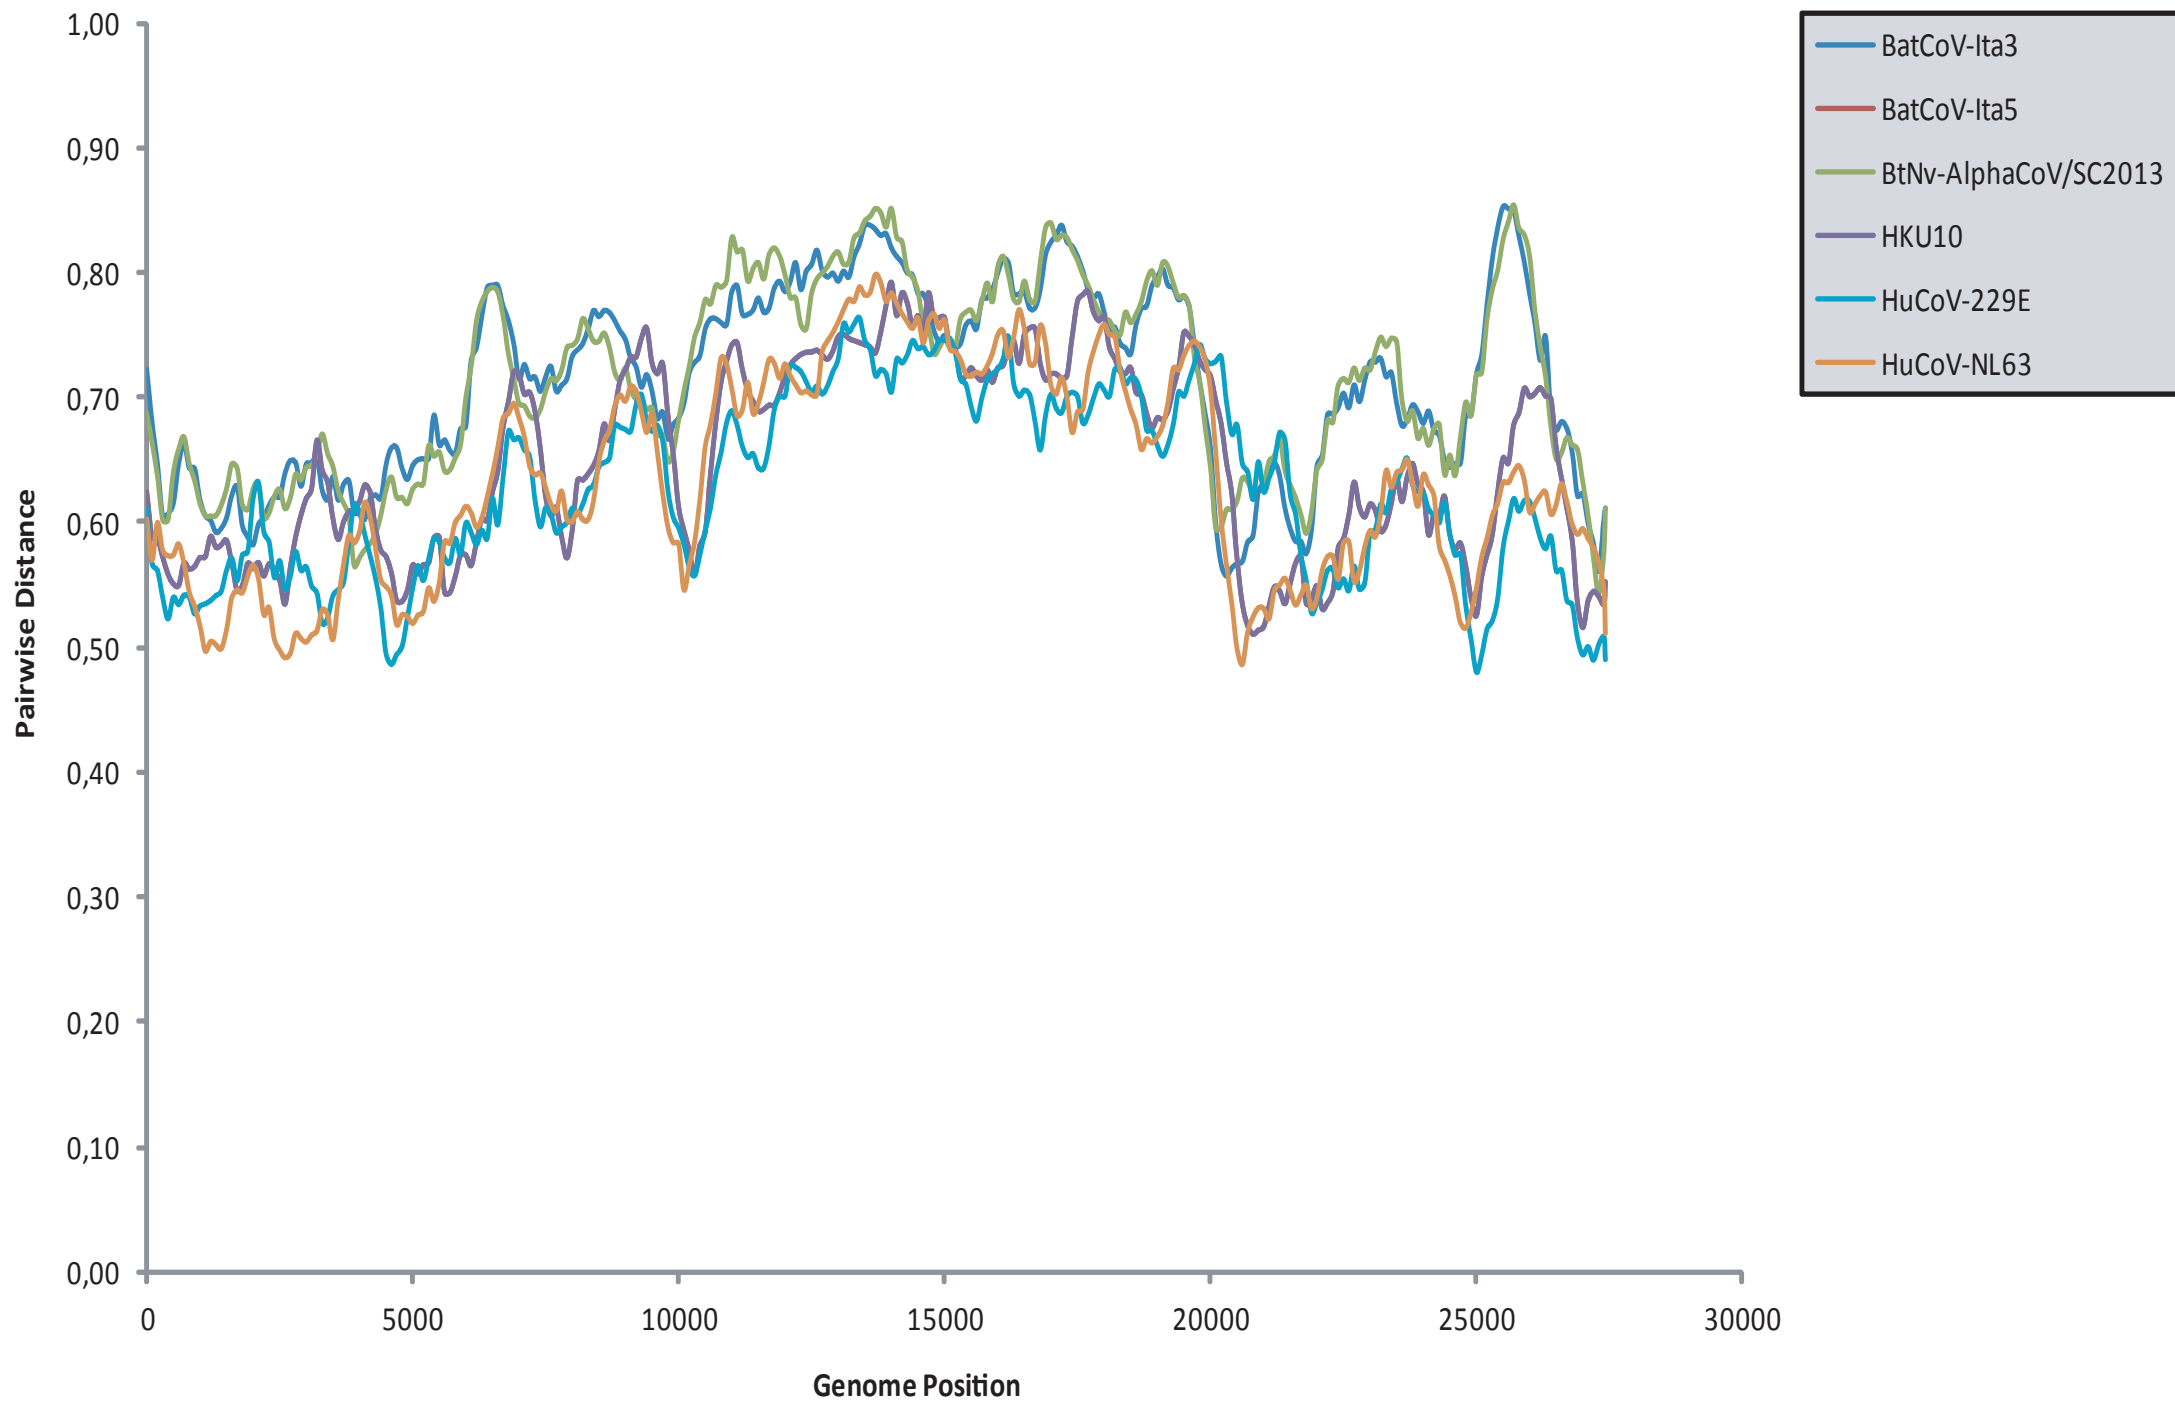

Supplement: mmc2.pdf [file mmc2.pdf]

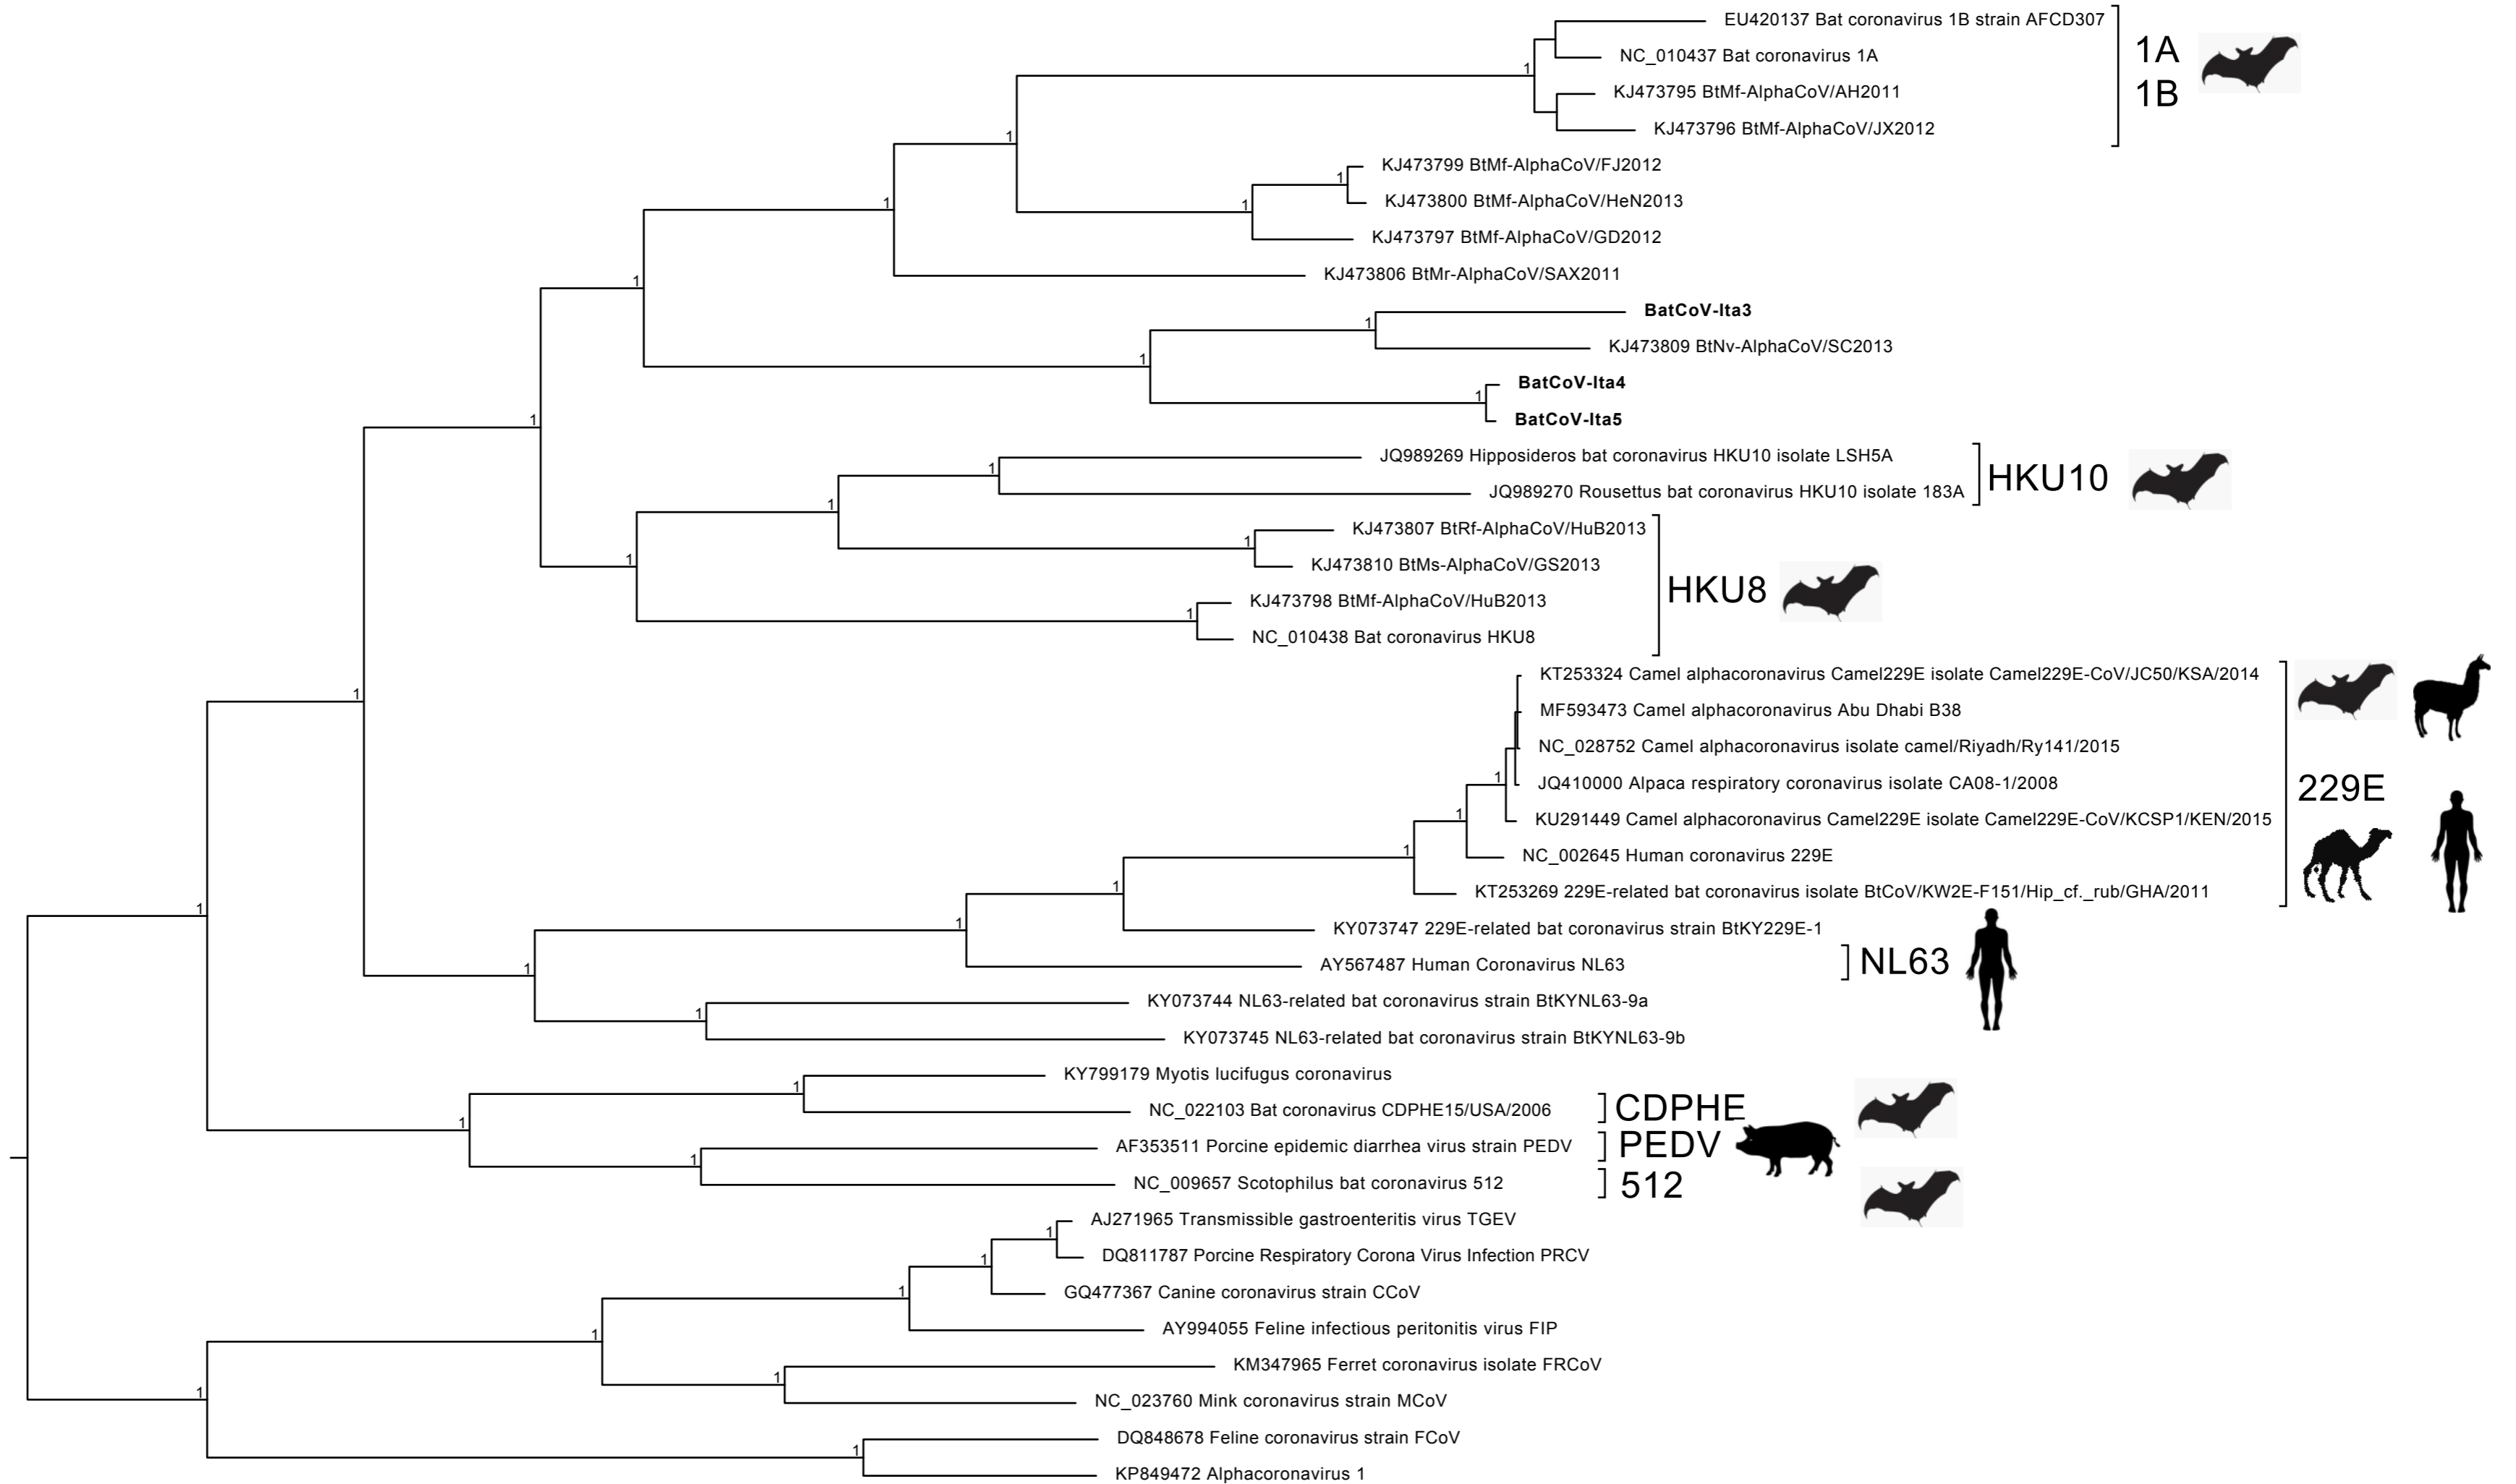

0.2

Supplement: mmc3.pdf [file mmc3.pdf]
